# Supplementary material for: Insights into a co-precursor driven solid-state thermal reaction of ferrocene carboxaldehyde leading to hematite nanomaterial: a reaction kinetic study
Source: Royal Society of Chemistry journal article supplement (doi:10.1039/d3ra07045j), 2023-01-01
Supplement: d3ra07045j1.pdf [file d3ra07045j1.pdf]

## Supplementary Information

### Insights into a Co-precursor Driven Solid-State Thermal Reaction of Ferrocene carboxaldehyde Leading to Hematite Nanomaterial through Reaction Kinetic Study

Manisha Chakraborty, Sani Kundu, Ashis Bhattacharjee\*

Department of Physics, Institute of Science, Visva-Bharati University, Santiniketan, 731235, India

**Table S1. The frequently used kinetic models with mechanisms operating in solid-state reactions<sup>52</sup>.**

| Sl.no. | Type of mechanism                                                   | Mechanism                                                | f( $\alpha$ )                                              | g( $\alpha$ )                                            | Function name                                            |                                                          |                                      |                                 |                                 |
|--------|---------------------------------------------------------------------|----------------------------------------------------------|------------------------------------------------------------|----------------------------------------------------------|----------------------------------------------------------|----------------------------------------------------------|--------------------------------------|---------------------------------|---------------------------------|
| 1      | Chemical Process or mechanism non-invoking equations                | Chemical Reaction                                        | $(3/2) (1-\alpha)^{2/3}$                                   | $1-(1-\alpha)^{2/3}$                                     | One-third order, $F_{1/3}$                               |                                                          |                                      |                                 |                                 |
| 2      |                                                                     |                                                          | $4(1-\alpha)^{3/4}$                                        | $1-(1-\alpha)^{1/4}$                                     | Three-quarters order, $F_{3/4}$                          |                                                          |                                      |                                 |                                 |
| 3      |                                                                     |                                                          | $2(1-\alpha)^{3/2}$                                        | $(1-\alpha)^{-1/2}-1$                                    | One and a half order, $F_{3/2}$                          |                                                          |                                      |                                 |                                 |
| 4      |                                                                     |                                                          | $(1-\alpha)^2$                                             | $(1-\alpha)^{-1}-1$                                      | Second order, $F_2$                                      |                                                          |                                      |                                 |                                 |
| 5      |                                                                     |                                                          | $(1/2) (1-\alpha)^3$                                       | $(1-\alpha)^{-2}-1$                                      | Third order, $F_3$                                       |                                                          |                                      |                                 |                                 |
| 6      | Acceleratory rate equations                                         | Nucleation                                               | $(2/3) \alpha^{-1/2}$                                      | $\alpha^{3/2}$                                           | Mampel power law, $P_{3/2}$                              |                                                          |                                      |                                 |                                 |
| 7      |                                                                     |                                                          | $2\alpha^{1/2}$                                            | $\alpha^{1/2}$                                           | Mampel power law, $P_{1/2}$                              |                                                          |                                      |                                 |                                 |
| 8      |                                                                     |                                                          | $3\alpha^{2/3}$                                            | $\alpha^{1/3}$                                           | Mampel power law, $P_{1/3}$                              |                                                          |                                      |                                 |                                 |
| 9      |                                                                     |                                                          | $4\alpha^{1/4}$                                            | $\alpha^{1/4}$                                           | Mampel power law, $P_{1/4}$                              |                                                          |                                      |                                 |                                 |
| 10     |                                                                     |                                                          | $\alpha$                                                   | $\ln \alpha$                                             | Exponential law, $E_1$                                   |                                                          |                                      |                                 |                                 |
| 11     | Sigmoidal rate Equations or Random nucleation and subsequent growth | Assumed random nucleation and its subsequent growth, n=1 | $(1-\alpha)$                                               | $-\ln(1-\alpha)$                                         | Avrami-Erofeev equations, $A_1$ , $F_1$                  |                                                          |                                      |                                 |                                 |
| 12     |                                                                     |                                                          | Assumed random nucleation and its subsequent growth, n=1.5 | $(3/2) (1-\alpha) [-\ln(1-\alpha)]^{1/3}$                | $[-\ln(1-\alpha)]^{2/3}$                                 | Avrami-Erofeev equations, $A_{3/2}$                      |                                      |                                 |                                 |
| 13     |                                                                     |                                                          |                                                            | Assumed random nucleation and its subsequent growth, n=2 | $2(1-\alpha) [-\ln(1-\alpha)]^{1/2}$                     | $[-\ln(1-\alpha)]^{1/2}$                                 | Avrami-Erofeev equations, $A_2$      |                                 |                                 |
| 14     |                                                                     |                                                          |                                                            |                                                          | Assumed random nucleation and its subsequent growth, n=3 | $3(1-\alpha) [-\ln(1-\alpha)]^{2/3}$                     | $[-\ln(1-\alpha)]^{1/3}$             | Avrami-Erofeev equations, $A_3$ |                                 |
| 15     |                                                                     |                                                          |                                                            |                                                          |                                                          | Assumed random nucleation and its subsequent growth, n=4 | $4(1-\alpha) [-\ln(1-\alpha)]^{3/4}$ | $[-\ln(1-\alpha)]^{1/4}$        | Avrami-Erofeev equations, $A_4$ |
| 16     |                                                                     |                                                          |                                                            |                                                          |                                                          |                                                          | Branching nuclei                     | $\alpha(1-\alpha)$              | $\ln[\alpha/(1-\alpha)]$        |
| 17     | Deceleratory                                                        | Contracting disk                                         |                                                            |                                                          |                                                          |                                                          |                                      | $(1-\alpha)^0$                  | $\alpha$                        |

|    |                                                     |                                             |                                                      |                                  |                                                    |
|----|-----------------------------------------------------|---------------------------------------------|------------------------------------------------------|----------------------------------|----------------------------------------------------|
| 18 | rate equations:<br>Phase boundary reaction          | Contracting cylinder (cylindrical symmetry) | $2(1-\alpha)^{1/2}$                                  | $1-(1-\alpha)^{1/2}$             | $F_0, P_1$<br>Power law, $R_2,$<br>$F_{1/2}$       |
| 19 | Deceleratory rate                                   | Contracting sphere (Spherical symmetry)     | $3(1-\alpha)^{2/3}$                                  | $1-(1-\alpha)^{1/3}$             | Power law, $R_3,$<br>$F_{2/3}$                     |
| 20 | equations:<br>Based on the Diffusion mechanism      | 1D diffusion                                | $1/2\alpha$                                          | $\alpha^2$                       | Parabola law,<br>$D_1$                             |
| 21 |                                                     | 2D diffusion                                | $[-\ln(1-\alpha)]^{-1}$                              | $\alpha+(1-\alpha)\ln(1-\alpha)$ | Valensi equation, $D_2$                            |
| 22 |                                                     | 3D diffusion, Spherical symmetry            | $(3/2)(1-\alpha)^{2/3}[1-(1-\alpha)^{1/3}]^{-1}$     | $[1-(1-\alpha)^{1/3}]^2$         | Jander equation, $D_3$                             |
| 23 |                                                     | 3D diffusion, Cylindrical symmetry          | $(3/2)[(1-\alpha)^{-1/3}-1]^{-1}$                    | $1-2\alpha/3-(1-\alpha)^{2/3}$   | Ginstling-Brounstein equation, $D_4$               |
| 24 |                                                     | 3D diffusion                                | $(3/2)(1-\alpha)^{4/3}[(1-\alpha)^{-1/3}-1]^{-1}$    | $[(1-\alpha)^{-1/3}-1]^2$        | Zhuravlev, Lesokin, Tempelman equation, $D_5$      |
| 25 |                                                     | 3D diffusion                                | $(3/2)(1+\alpha)^{4/3}[(1+\alpha)^{-1/3}-1]^{-1}$    | $[(1+\alpha)^{1/3}-1]^2$         | Anti-Jander equation, $D_6$                        |
| 26 |                                                     | 3D diffusion                                | $(3/2)[(1+\alpha)^{-1/3}-1]^{-1}$                    | $1+2\alpha/3-(1+\alpha)^{2/3}$   | Anti-Ginstling-Brounstein equation, $D_7$          |
| 27 |                                                     | 3D diffusion                                | $(3/2)(1+\alpha)^{4/3}[(1+\alpha)^{-1/3}-1]^{-1}$    | $[(1+\alpha)^{-1/3}-1]^2$        | Anti-Zhuravlev, Lesokin, Tempelman equation, $D_8$ |
| 28 | Other kinetics equations with unjustified mechanism | -                                           | $1/2(1-\alpha)$                                      | $1-(1-\alpha)^2$                 | $G_1$                                              |
| 29 |                                                     | -                                           | $1/3(1-\alpha)^2$                                    | $1-(1-\alpha)^3$                 | $G_2$                                              |
| 30 |                                                     | -                                           | $1/4(1-\alpha)^3$                                    | $1-(1-\alpha)^4$                 | $G_3$                                              |
| 31 |                                                     | -                                           | $(1/2)(1-\alpha)[-\ln(1-\alpha)]^{-1}$               | $[-\ln(1-\alpha)]^2$             | $G_4$                                              |
| 32 |                                                     | -                                           | $(1/3)(1-\alpha)[-\ln(1-\alpha)]^{-2}$               | $[-\ln(1-\alpha)]^3$             | $G_5$                                              |
| 33 |                                                     | -                                           | $(1/4)(1-\alpha)[-\ln(1-\alpha)]^{-3}$               | $[-\ln(1-\alpha)]^4$             | $G_6$                                              |
| 34 |                                                     | -                                           | $4\{(1-\alpha)[1-\ln(1-\alpha)]^{1/2}\}^{1/2}$       | $[1-(1-\alpha)^{1/2}]^{1/2}$     | $G_7$                                              |
| 35 |                                                     | -                                           | $6\{(1-\alpha)^{2/3}[1-\ln(1-\alpha)]^{1/3}\}^{1/2}$ | $[1-(1-\alpha)^{1/2}]^{1/2}$     | $G_8$                                              |

**Table S2** Comparison of the fit parameters following Fraser-Suzuki equation for different steps of thermal decomposition of OxA, FcCHO and FO11 in O<sub>2</sub> atmosphere.

FO11 at 3 K min<sup>-1</sup>

| Parameter            | Step-1                        | Step-2                        | Step-3                         | Step-4                                        | Step-5                        | Step-6                        |
|----------------------|-------------------------------|-------------------------------|--------------------------------|-----------------------------------------------|-------------------------------|-------------------------------|
| h (K <sup>-1</sup> ) | 0.003 ± 1.03×10 <sup>-5</sup> | 0.003 ± 2.35×10 <sup>-5</sup> | 0.006 ± 6.87 ×10 <sup>-5</sup> | 5.38×10 <sup>-4</sup> ± 1.33×10 <sup>-5</sup> | 0.007 ± 9.24×10 <sup>-5</sup> | 0.006 ± 6.32×10 <sup>-5</sup> |
| p (K)                | 364.39 ± 0.13                 | 408.12 ± 0.19                 | 433.14 ± 0.25                  | 465.07 ± 0.65                                 | 530.19 ± 0.40                 | 564.48 ± 0.35                 |
| w (K)                | 41.59 ± 0.20                  | 27.80 ± 0.35                  | 28.65 ± 0.38                   | 30.34 ± 1.53                                  | 36.65 ± 0.61                  | 40.67 ± 0.91                  |
| s (-)                | -0.68 ± 0.01                  | -0.46 ± 0.03                  | -0.13 ± 0.03                   | 0.25 ± 0.11                                   | -0.32 ± 0.03                  | 0.15 ± 0.04                   |
| r <sup>2</sup>       | 0.99                          | 0.99                          | 0.99                           | 0.97                                          | 0.99                          | 0.99                          |
| ΔT (K)               | 300-390                       | 332-432                       | 382-468                        | 439-515                                       | 440-568                       | 515-625                       |

FcCHO at 3 K min<sup>-1</sup>

|                      |                               |                               |                               |                                               |                               |                               |
|----------------------|-------------------------------|-------------------------------|-------------------------------|-----------------------------------------------|-------------------------------|-------------------------------|
| h (K <sup>-1</sup> ) | 0.005 ± 1.01×10 <sup>-4</sup> | 0.001 ± 8.72×10 <sup>-5</sup> | 0.002 ± 8.00×10 <sup>-5</sup> | 9.63×10 <sup>-4</sup> ± 5.18×10 <sup>-5</sup> | 0.004 ± 3.97×10 <sup>-5</sup> | 0.018 ± 9.74×10 <sup>-5</sup> |
| p (K)                | 432.19 ± 0                    | 465.53 ± 0                    | 481.69 ± 0                    | 493.14 ± 0                                    | 600.67 ± 0.59                 | 642.87 ± 0.13                 |
| w (K)                | 16.16 ± 0                     | 12.13 ± 0                     | 11.02 ± 0                     | 10.34 ± 0                                     | 58.46 ± 0.95                  | 29.30 ± 0.45                  |
| s (-)                | -0.86 ± .0                    | -0.38 ± 0                     | -0.15 ± .0                    | 0.25 ± .0                                     | -0.56 ± .04                   | -0.19 ± .03                   |
| r <sup>2</sup>       | 0.97                          | 0.83                          | 0.94                          | 0.94                                          | 0.98                          | 0.99                          |
| ΔT (K)               | 380-440                       | 446-479                       | 464-494                       | 472-512                                       | 452-641                       | 585-678                       |

OxA at 5 K min<sup>-1</sup>

|                      |                               |                                               |               |
|----------------------|-------------------------------|-----------------------------------------------|---------------|
| h (K <sup>-1</sup> ) | 0.001 ± 9.52×10 <sup>-5</sup> | 4.80×10 <sup>-4</sup> ± 1.78×10 <sup>-5</sup> | 0.004 ± 0.001 |
| p (K)                | 375.38 ± 0.15                 | 402.44 ± 0.95                                 | 468.40 ± 0.20 |
| w (K)                | 19.71 ± 0.28                  | 23.14 ± 1.89                                  | 10.30 ± 0.50  |
| s (-)                | -0.84 ± 0.02                  | -0.44 ± 0.24                                  | -1.15 ± 0.09  |
| r <sup>2</sup>       | 0.99                          | 0.80                                          | 0.94          |
| ΔT (K)               | 304-387                       | 378-414                                       | 380-474       |

$h$  = peak amplitude,  $p$  = peak temperature,  $w$  = half width and  $s$  = asymmetry,  $r^2$  = co-relational factor,  $\Delta T$  = range of step.

**Table S3** The fit parameters following Fraser-Suzuki equation for different steps of thermal decomposition of FO11 in O<sub>2</sub> atmosphere under different heating rates ( $\beta$ )

| Parameter                                         | Step-1                        | Step-2                        | Step-3                         | Step-4                                        | Step-5                        | Step-6                        |
|---------------------------------------------------|-------------------------------|-------------------------------|--------------------------------|-----------------------------------------------|-------------------------------|-------------------------------|
| <b><math>\beta = 3 \text{ K min}^{-1}</math></b>  |                               |                               |                                |                                               |                               |                               |
| h (K <sup>-1</sup> )                              | 0.003 ± 1.03×10 <sup>-5</sup> | 0.003 ± 2.35×10 <sup>-5</sup> | 0.006 ± 6.87 ×10 <sup>-5</sup> | 5.38×10 <sup>-4</sup> ± 1.33×10 <sup>-5</sup> | 0.007 ± 9.24×10 <sup>-5</sup> | 0.006 ± 6.32×10 <sup>-5</sup> |
| p (K)                                             | 364.39 ± 0.13                 | 408.12 ± 0.19                 | 433.14 ± 0.25                  | 465.07 ± 0.65                                 | 530.19 ± 0.40                 | 564.48 ± 0.35                 |
| w (K)                                             | 41.59 ± 0.20                  | 27.80 ± 0.35                  | 28.65 ± 0.38                   | 30.34 ± 1.53                                  | 36.65 ± 0.61                  | 40.67 ± 0.91                  |
| s (-)                                             | -0.68 ± 0.01                  | -0.46 ± 0.03                  | -0.13 ± 0.03                   | 0.25 ± 0.11                                   | -0.32 ± 0.03                  | 0.15 ± 0.04                   |
| r <sup>2</sup>                                    | 0.99                          | 0.99                          | 0.99                           | 0.97                                          | 0.99                          | 0.99                          |
| $\Delta T$ (K)                                    | 300-390                       | 332-432                       | 382-468                        | 439-515                                       | 440-568                       | 515-625                       |
| <b><math>\beta = 6 \text{ K min}^{-1}</math></b>  |                               |                               |                                |                                               |                               |                               |
| h (K <sup>-1</sup> )                              | 0.003 ± 5.21×10 <sup>-5</sup> | 0.003 ± 3.65×10 <sup>-5</sup> | 0.008 ± 9.36×10 <sup>-5</sup>  | 4.14×10 <sup>-4</sup> ± 1.30×10 <sup>-5</sup> | 0.008 ± 9.36×10 <sup>-5</sup> | 0.005 ± 5.73×10 <sup>-5</sup> |
| p (K)                                             | 372.95 ± 0                    | 417.85 ± 0.31                 | 443.41 ± 0.27                  | 482.58 ± 1.27                                 | 538.25 ± 0.35                 | 570.98 ± 0.28                 |
| w (K)                                             | 37.49 ± 0.74                  | 26.73 ± 0.49                  | 26.30 ± 0.78                   | 37.84 ± 2.43                                  | 35.35 ± 0.53                  | 34.08 ± 0.48                  |
| s (-)                                             | -0.58 ± 0                     | -0.65 ± 0.05                  | -0.22 ± 0.27                   | -0.12 ± 0.20                                  | -0.31 ± 0.03                  | 0.43 ± 0.03                   |
| r <sup>2</sup>                                    | 0.98                          | 0.99                          | 0.99                           | 0.90                                          | 0.99                          | 0.99                          |
| $\Delta T$ (K)                                    | 307-398                       | 337-435                       | 400-468                        | 435-523                                       | 473-570                       | 544-646                       |
| <b><math>\beta = 9 \text{ K min}^{-1}</math></b>  |                               |                               |                                |                                               |                               |                               |
| h (K <sup>-1</sup> )                              | 0.003 ± 5.97×10 <sup>-5</sup> | 0.004 ± 2.94×10 <sup>-5</sup> | 0.007 ± 7.84×10 <sup>-5</sup>  | 2.25×10 <sup>-4</sup> ± 2.24×10 <sup>-6</sup> | 0.009 ± 8.96×10 <sup>-5</sup> | 0.007 ± 4.81×10 <sup>-5</sup> |
| p (K)                                             | 372.07 ± 0.55                 | 424.16 ± 0.19                 | 449.53 ± 0.21                  | 479.87 ± 0.17                                 | 549.34 ± 0.35                 | 577.48 ± 0.17                 |
| w (K)                                             | 35.79 ± 0.83                  | 25.85 ± 0.27                  | 23.99 ± 0.88                   | 22.13 ± 0.87                                  | 34.46 ± 1.53                  | 30.99 ± 0.27                  |
| s (-)                                             | -0.37 ± .05                   | -0.51 ± .03                   | -0.10 ± 0.06                   | 0.64 ± 0.11                                   | -0.37 ± .05                   | 0.38 ± 0.02                   |
| r <sup>2</sup>                                    | 0.98                          | 0.99                          | 0.99                           | 0.99                                          | 0.99                          | 0.99                          |
| $\Delta T$ (K)                                    | 300-402                       | 347-445                       | 406-481                        | 463-520                                       | 458-585                       | 549-656                       |
| <b><math>\beta = 15 \text{ K min}^{-1}</math></b> |                               |                               |                                |                                               |                               |                               |
| h (K <sup>-1</sup> )                              | 0.003 ± 5.29×10 <sup>-5</sup> | 0.005 ± 2.02×10 <sup>-5</sup> | 0.008 ± 3.36×10 <sup>-5</sup>  | 3.61×10 <sup>-4</sup> ± 7.91×10 <sup>-6</sup> | 0.012 ± 0.00                  | 0.011 ± 1.24×10 <sup>-4</sup> |
| p (K)                                             | 374.32 ± 0.61                 | 429.19 ± 0.14                 | 461.54 ± 0.07                  | 525.56 ± 0.07                                 | 562.47 ± 0.21                 | 580.07 ± 0.13                 |
| w (K)                                             | 39.45 ± 0.89                  | 33.75 ± 0.38                  | 19.59 ± 0.22                   | 28.33 ± 1.18                                  | 25.79 ± 0.25                  | 15.45 ± 0.19                  |
| s (-)                                             | -0.15 ± 0.05                  | -0.25 ± 0.03                  | -0.11 ± 0.02                   | -0.61 ± 0.12                                  | -0.36 ± 0.03                  | 0.03 ± 0.02                   |
| r <sup>2</sup>                                    | 0.98                          | 0.99                          | 0.99                           | 0.97                                          | 0.99                          | 0.99                          |
| $\Delta T$ (K)                                    | 310-419                       | 367-465                       | 426-488                        | 494-545                                       | 503-586                       | 552-614                       |

$h$  = peak amplitude,  $p$  = peak temperature,  $w$  = half width and  $s$  = asymmetry,  $r^2$  = co-relational factor,  $\Delta T$  = range of step.

**Table S4. Results obtained on linear fitting of  $\ln(\beta/T^n)$  vs.  $1/T$  curves following FWO, KAS, Tang and Starink methods (eqs (5a-d)) for different steps of thermal decomposition of FO11 in O<sub>2</sub> atmosphere.**

| Method        | $\alpha$ | Slope $a$ | Error   | Intercept $b$ | Regression $R^2$ |
|---------------|----------|-----------|---------|---------------|------------------|
| <b>Step-4</b> |          |           |         |               |                  |
| Eq 5a         | 0.10     | -8708.45  | 1718.98 | 20.54         | 0.93             |
|               | 0.15     | -8191.15  | 1619.37 | 19.29         | 0.93             |
|               | 0.20     | -7781.96  | 1625.39 | 18.32         | 0.92             |
|               | 0.25     | -7590.17  | 1665.56 | 17.83         | 0.91             |
|               | 0.30     | -7460.94  | 1710.80 | 17.49         | 0.90             |
|               | 0.35     | -7361.54  | 1767.89 | 17.22         | 0.90             |
|               | 0.40     | -7302.59  | 1774.48 | 17.04         | 0.89             |
|               | 0.45     | -7289.29  | 1803.04 | 16.95         | 0.89             |
|               | 0.50     | -7287.12  | 1817.94 | 16.89         | 0.89             |
|               | 0.55     | -7337.02  | 1854.47 | 16.93         | 0.89             |
|               | 0.60     | -7377.25  | 1843.41 | 16.96         | 0.89             |
|               | 0.65     | -7479.30  | 1854.96 | 17.11         | 0.89             |
|               | 0.70     | -7619.03  | 1816.24 | 17.33         | 0.90             |
|               | 0.75     | -7817.15  | 1802.79 | 17.65         | 0.90             |
|               | 0.80     | -8060.87  | 1726.07 | 18.06         | 0.92             |
|               | 0.85     | -8480.69  | 1615.15 | 18.79         | 0.93             |
| 0.90          | -8986.46 | 1322.96   | 19.66   | 0.97          |                  |
| Eq 5b         | 0.10     | -7767.10  | 1723.35 | 6.23          | 0.91             |
|               | 0.15     | -7239.26  | 1626.74 | 4.96          | 0.91             |
|               | 0.20     | -6822.32  | 1634.25 | 3.97          | 0.90             |
|               | 0.25     | -6624.30  | 1675.02 | 3.47          | 0.89             |
|               | 0.30     | -6489.81  | 1720.56 | 3.12          | 0.88             |
|               | 0.35     | -6385.68  | 1777.71 | 2.84          | 0.87             |
|               | 0.40     | -6322.58  | 1784.42 | 2.65          | 0.86             |
|               | 0.45     | -6305.14  | 1812.96 | 2.55          | 0.86             |
|               | 0.50     | -6299.33  | 1827.86 | 2.48          | 0.85             |
|               | 0.55     | -6345.52  | 1864.28 | 2.52          | 0.85             |
|               | 0.60     | -6382.00  | 1853.29 | 2.53          | 0.86             |
|               | 0.65     | -6480.65  | 1864.79 | 2.68          | 0.86             |
|               | 0.70     | -6616.64  | 1826.16 | 2.89          | 0.87             |
|               | 0.75     | -6810.60  | 1812.76 | 3.21          | 0.88             |
|               | 0.80     | -7050.27  | 1736.13 | 3.60          | 0.89             |
|               | 0.85     | -7465.18  | 1625.32 | 4.33          | 0.91             |
| 0.90          | -7968.83 | 1333.02   | 5.19    | 0.95          |                  |
| Eq 5c         | 0.10     | -7816.68  | 1723.11 | 6.99          | 0.91             |
|               | 0.15     | -7289.40  | 1626.35 | 5.72          | 0.91             |
|               | 0.20     | -6872.86  | 1633.78 | 4.73          | 0.90             |
|               | 0.25     | -6675.17  | 1674.52 | 4.23          | 0.89             |
|               | 0.30     | -6540.96  | 1720.05 | 3.87          | 0.88             |
|               | 0.35     | -6437.08  | 1777.19 | 3.59          | 0.87             |
|               | 0.40     | -6374.20  | 1783.89 | 3.40          | 0.86             |
|               | 0.45     | -6356.97  | 1812.44 | 3.31          | 0.86             |
|               | 0.50     | -6351.35  | 1827.34 | 3.24          | 0.86             |
|               | 0.55     | -6397.74  | 1863.77 | 3.28          | 0.85             |
|               | 0.60     | -6434.42  | 1852.77 | 3.29          | 0.86             |
|               | 0.65     | -6533.25  | 1864.27 | 3.44          | 0.86             |
|               | 0.70     | -6669.43  | 1825.63 | 3.65          | 0.87             |
|               | 0.75     | -6863.62  | 1812.23 | 3.97          | 0.88             |
|               | 0.80     | -7103.49  | 1735.60 | 4.37          | 0.89             |
|               | 0.85     | -7518.67  | 1624.78 | 5.09          | 0.91             |
| 0.90          | -8022.61 | 1332.49   | 5.95    | 0.92          |                  |

|               |      |           |         |       |      |
|---------------|------|-----------|---------|-------|------|
| Eq 5d         | 0.10 | -7790.63  | 1723.24 | 6.59  | 0.91 |
|               | 0.15 | -7263.06  | 1626.56 | 5.32  | 0.91 |
|               | 0.20 | -6846.31  | 1634.02 | 4.33  | 0.90 |
|               | 0.25 | -6648.44  | 1674.79 | 3.83  | 0.89 |
|               | 0.30 | -6514.08  | 1720.32 | 3.48  | 0.88 |
|               | 0.35 | -6410.07  | 1777.47 | 3.20  | 0.87 |
|               | 0.40 | -6347.08  | 1784.17 | 3.00  | 0.86 |
|               | 0.45 | -6329.74  | 1812.72 | 2.91  | 0.86 |
|               | 0.50 | -6324.02  | 1827.61 | 2.84  | 0.86 |
|               | 0.55 | -6370.31  | 1864.04 | 2.88  | 0.85 |
|               | 0.60 | -6406.88  | 1853.05 | 2.90  | 0.86 |
|               | 0.65 | -6505.62  | 1864.54 | 3.04  | 0.86 |
|               | 0.70 | -6641.70  | 1825.91 | 3.25  | 0.87 |
|               | 0.75 | -6835.76  | 1812.50 | 3.57  | 0.88 |
|               | 0.80 | -7075.53  | 1735.87 | 3.97  | 0.89 |
|               | 0.85 | -7490.57  | 1625.07 | 4.69  | 0.91 |
|               | 0.90 | -7994.35  | 1332.77 | 5.55  | 0.95 |
| <b>Step-5</b> |      |           |         |       |      |
| Eq 5a         | 0.10 | -10454.66 | 1896.79 | 22.18 | 0.94 |
|               | 0.15 | -11059.07 | 1880.13 | 23.13 | 0.95 |
|               | 0.20 | -11535.43 | 1881.06 | 23.88 | 0.95 |
|               | 0.25 | -11938.34 | 1883.59 | 24.51 | 0.95 |
|               | 0.30 | -12333.15 | 1909.56 | 25.14 | 0.95 |
|               | 0.35 | -12699.29 | 1850.69 | 25.71 | 0.96 |
|               | 0.40 | -13055.23 | 1903.28 | 26.28 | 0.97 |
|               | 0.45 | -13426.98 | 1883.28 | 26.88 | 0.96 |
|               | 0.50 | -13698.30 | 1893.32 | 27.28 | 0.96 |
|               | 0.55 | -14098.60 | 1877.43 | 27.94 | 0.97 |
|               | 0.60 | -14386.75 | 1901.29 | 28.38 | 0.97 |
|               | 0.65 | -14721.95 | 1878.83 | 28.90 | 0.97 |
|               | 0.70 | -15222.27 | 1931.69 | 29.72 | 0.97 |
|               | 0.75 | -15654.57 | 1956.58 | 30.41 | 0.97 |
|               | 0.80 | -16020.55 | 1940.11 | 30.97 | 0.97 |
|               | 0.85 | -16623.88 | 1998.63 | 31.94 | 0.97 |
|               | 0.90 | -17247.14 | 1963.08 | 32.90 | 0.97 |
| Eq 5b         | 0.10 | -9414.37  | 1905.03 | 7.67  | 0.92 |
|               | 0.15 | -10009.09 | 1888.00 | 8.61  | 0.93 |
|               | 0.20 | -10478.10 | 1888.62 | 9.34  | 0.93 |
|               | 0.25 | -10875.17 | 1890.86 | 9.96  | 0.94 |
|               | 0.30 | -11264.75 | 1916.58 | 10.57 | 0.95 |
|               | 0.35 | -11626.63 | 1857.45 | 11.14 | 0.95 |
|               | 0.40 | -11978.17 | 1909.89 | 11.70 | 0.95 |
|               | 0.45 | -12346.21 | 1889.67 | 12.29 | 0.96 |
|               | 0.50 | -12613.68 | 1899.44 | 12.69 | 0.96 |
|               | 0.55 | -13010.65 | 1883.41 | 13.34 | 0.96 |
|               | 0.60 | -13295.25 | 1906.95 | 13.77 | 0.96 |
|               | 0.65 | -13626.97 | 1884.28 | 14.29 | 0.96 |
|               | 0.70 | -14123.69 | 1936.90 | 15.10 | 0.96 |
|               | 0.75 | -14552.33 | 1961.49 | 15.78 | 0.96 |
|               | 0.80 | -14914.43 | 1944.78 | 16.33 | 0.97 |
|               | 0.85 | -15513.52 | 2003.01 | 17.29 | 0.97 |
|               | 0.90 | -16131.57 | 1966.87 | 18.25 | 0.97 |
| Eq 5c         | 0.10 | -9469.16  | 1904.59 | 8.43  | 0.93 |
|               | 0.15 | -10064.40 | 1887.59 | 9.37  | 0.93 |
|               | 0.20 | -10533.79 | 1888.22 | 10.10 | 0.94 |
|               | 0.25 | -10931.17 | 1890.48 | 10.72 | 0.94 |
|               | 0.30 | -11321.02 | 1916.21 | 11.34 | 0.95 |
|               | 0.35 | -11683.12 | 1857.09 | 11.91 | 0.95 |

|               |      |           |         |       |      |
|---------------|------|-----------|---------|-------|------|
|               | 0.40 | -12034.90 | 1909.54 | 12.47 | 0.95 |
|               | 0.45 | -12403.14 | 1889.34 | 13.06 | 0.96 |
|               | 0.50 | -12670.81 | 1899.12 | 13.46 | 0.96 |
|               | 0.55 | -13067.96 | 1883.09 | 14.11 | 0.96 |
|               | 0.60 | -13352.74 | 1906.66 | 14.54 | 0.96 |
|               | 0.65 | -13684.64 | 1883.99 | 15.06 | 0.96 |
|               | 0.70 | -14181.55 | 1936.63 | 15.87 | 0.96 |
|               | 0.75 | -14610.38 | 1961.23 | 16.55 | 0.97 |
|               | 0.80 | -14972.69 | 1944.53 | 17.10 | 0.97 |
|               | 0.85 | -15572.01 | 2002.78 | 18.07 | 0.97 |
|               | 0.90 | -16190.33 | 1966.67 | 19.02 | 0.97 |
| Eq 5d         | 0.10 | -9440.38  | 1904.83 | 8.03  | 0.94 |
|               | 0.15 | -10035.34 | 1887.80 | 8.97  | 0.93 |
|               | 0.20 | -10504.53 | 1888.43 | 9.70  | 0.94 |
|               | 0.25 | -10901.75 | 1890.68 | 10.32 | 0.94 |
|               | 0.30 | -11291.46 | 1916.40 | 10.94 | 0.95 |
|               | 0.35 | -11653.45 | 1857.28 | 11.51 | 0.95 |
|               | 0.40 | -12005.10 | 1909.73 | 12.07 | 0.95 |
|               | 0.45 | -12373.23 | 1889.51 | 12.66 | 0.96 |
|               | 0.50 | -12640.80 | 1899.29 | 13.06 | 0.96 |
|               | 0.55 | -13037.85 | 1883.26 | 13.70 | 0.96 |
|               | 0.60 | -13322.54 | 1906.81 | 14.14 | 0.96 |
|               | 0.65 | -13654.34 | 1884.14 | 14.65 | 0.96 |
|               | 0.70 | -14151.16 | 1936.77 | 15.47 | 0.96 |
|               | 0.75 | -14579.88 | 1961.37 | 16.15 | 0.97 |
|               | 0.80 | -14942.08 | 1944.66 | 16.70 | 0.97 |
|               | 0.85 | -15541.28 | 2002.90 | 17.66 | 0.97 |
|               | 0.90 | -16159.46 | 1966.77 | 18.61 | 0.97 |
| <b>Step-6</b> |      |           |         |       |      |
| Eq 5a         | 0.10 | -16221.06 | 747.75  | 30.81 | 0.99 |
|               | 0.15 | -17587.17 | 537.00  | 33.09 | 0.99 |
|               | 0.20 | -18572.60 | 760.98  | 34.70 | 0.99 |
|               | 0.25 | -19524.50 | 455.84  | 36.25 | 0.99 |
|               | 0.30 | -20405.88 | 471.02  | 37.68 | 0.99 |
|               | 0.35 | -21207.22 | 296.80  | 38.96 | 0.99 |
|               | 0.40 | -22147.94 | 578.12  | 40.49 | 0.99 |
|               | 0.45 | -22938.33 | 703.53  | 41.72 | 0.99 |
|               | 0.50 | -23770.31 | 844.41  | 43.03 | 0.99 |
|               | 0.55 | -24655.21 | 1003.15 | 44.42 | 0.99 |
|               | 0.60 | -25040.23 | 1736.02 | 44.92 | 0.99 |
|               | 0.65 | -25238.21 | 1749.16 | 45.09 | 0.99 |
|               | 0.70 | -26081.70 | 2441.41 | 46.34 | 0.99 |
|               | 0.75 | -25983.94 | 3345.21 | 45.96 | 0.98 |
|               | 0.80 | -26353.44 | 4201.49 | 46.33 | 0.98 |
|               | 0.85 | -26202.80 | 5918.69 | 45.78 | 0.95 |
|               | 0.90 | -24673.49 | 7275.57 | 42.82 | 0.92 |
| Eq 5b         | 0.10 | -15110.11 | 742.65  | 16.17 | 0.99 |
|               | 0.15 | -16469.73 | 532.10  | 18.44 | 0.99 |
|               | 0.20 | -17450.21 | 756.39  | 20.04 | 0.99 |
|               | 0.25 | -18397.21 | 451.29  | 21.58 | 0.99 |
|               | 0.30 | -19274.26 | 466.63  | 23.00 | 0.99 |
|               | 0.35 | -20071.48 | 292.48  | 24.28 | 0.99 |
|               | 0.40 | -21008.37 | 574.05  | 25.79 | 0.99 |
|               | 0.45 | -21794.64 | 699.60  | 27.03 | 0.99 |
|               | 0.50 | -22622.59 | 840.62  | 28.33 | 0.99 |
|               | 0.55 | -23503.37 | 999.51  | 29.70 | 0.99 |
|               | 0.60 | -23884.20 | 1732.62 | 30.20 | 0.99 |
|               | 0.65 | -24077.62 | 1745.77 | 30.36 | 0.99 |

|       |      |           |         |       |      |
|-------|------|-----------|---------|-------|------|
|       | 0.70 | -24916.19 | 2438.30 | 31.61 | 0.99 |
|       | 0.75 | -24813.00 | 3342.37 | 31.21 | 0.98 |
|       | 0.80 | -25175.96 | 4198.96 | 31.57 | 0.97 |
|       | 0.85 | -25017.81 | 5916.84 | 31.01 | 0.95 |
|       | 0.90 | -23477.93 | 7274.42 | 28.04 | 0.91 |
| Eq 5c | 0.10 | -15168.62 | 742.92  | 16.94 | 0.99 |
|       | 0.15 | -16528.59 | 532.35  | 19.21 | 0.99 |
|       | 0.20 | -17509.33 | 756.63  | 20.81 | 0.99 |
|       | 0.25 | -18456.58 | 451.53  | 22.36 | 0.99 |
|       | 0.30 | -19333.86 | 466.86  | 23.78 | 0.99 |
|       | 0.35 | -20131.30 | 292.71  | 25.05 | 0.99 |
|       | 0.40 | -21068.39 | 574.26  | 26.57 | 0.99 |
|       | 0.45 | -21854.88 | 699.81  | 27.80 | 0.99 |
|       | 0.50 | -22683.04 | 840.83  | 29.10 | 0.99 |
|       | 0.55 | -23564.04 | 999.70  | 30.48 | 0.99 |
|       | 0.60 | -23945.09 | 1732.80 | 30.97 | 0.99 |
|       | 0.65 | -24138.75 | 1745.95 | 31.14 | 0.99 |
|       | 0.70 | -24977.58 | 2438.46 | 32.38 | 0.99 |
|       | 0.75 | -24874.67 | 3342.52 | 31.99 | 0.98 |
|       | 0.80 | -25237.98 | 4199.09 | 32.35 | 0.97 |
|       | 0.85 | -25080.22 | 5916.95 | 31.79 | 0.95 |
|       | 0.90 | -23540.90 | 7274.48 | 28.82 | 0.91 |
| Eq 5d | 0.10 | -15137.88 | 742.78  | 16.53 | 0.99 |
|       | 0.15 | -16497.67 | 532.22  | 18.80 | 0.99 |
|       | 0.20 | -17478.27 | 756.50  | 20.41 | 0.99 |
|       | 0.25 | -18425.39 | 451.40  | 21.95 | 0.99 |
|       | 0.30 | -19302.55 | 466.74  | 23.37 | 0.99 |
|       | 0.35 | -20099.87 | 292.59  | 24.65 | 0.99 |
|       | 0.40 | -21036.86 | 574.15  | 26.16 | 0.99 |
|       | 0.45 | -21823.23 | 699.70  | 27.39 | 0.99 |
|       | 0.50 | -22651.29 | 840.72  | 28.69 | 0.99 |
|       | 0.55 | -23532.17 | 999.60  | 30.07 | 0.99 |
|       | 0.60 | -23913.10 | 1732.71 | 30.56 | 0.99 |
|       | 0.65 | -24106.64 | 1745.85 | 30.73 | 0.99 |
|       | 0.70 | -24945.33 | 2438.38 | 31.98 | 0.99 |
|       | 0.75 | -24842.27 | 3342.44 | 31.58 | 0.98 |
|       | 0.80 | -25205.40 | 4199.02 | 31.94 | 0.97 |
|       | 0.85 | -25047.43 | 5916.89 | 31.38 | 0.95 |
|       | 0.90 | -23507.81 | 7274.45 | 28.40 | 0.91 |



**Table S5. Values of the activation energy for Step-4, Step-5 and Step-6 of thermal decomposition of FO11 using eqs 5a-f.**

| $\alpha$      | $E_a$ (kJ mole <sup>-1</sup> ) |                |                |                |        |        |
|---------------|--------------------------------|----------------|----------------|----------------|--------|--------|
|               | Eq 5a                          | Eq 5b          | Eq 5c          | Eq 5d          | Eq 5e  | Eq 5f  |
| <b>Step-4</b> |                                |                |                |                |        |        |
| 0.10          | 68.85 ± 13.60                  | 64.58 ± 14.33  | 64.89 ± 14.31  | 64.77 ± 14.33  | 64.96  | 64.97  |
| 0.15          | 64.76 ± 12.81                  | 60.19 ± 13.52  | 60.52 ± 13.50  | 60.39 ± 13.52  | 60.6   | 60.63  |
| 0.20          | 61.52 ± 12.86                  | 56.72 ± 13.59  | 57.06 ± 13.56  | 56.92 ± 13.59  | 57.16  | 57.20  |
| 0.25          | 60.01 ± 13.17                  | 55.07 ± 13.93  | 55.42 ± 13.90  | 55.28 ± 13.92  | 55.53  | 55.57  |
| 0.30          | 58.99 ± 13.53                  | 53.96 ± 14.30  | 54.30 ± 14.28  | 54.16 ± 14.30  | 54.43  | 54.46  |
| 0.35          | 58.20 ± 13.98                  | 53.09 ± 14.78  | 53.44 ± 14.75  | 53.29 ± 14.78  | 53.57  | 53.61  |
| 0.40          | 57.73 ± 14.03                  | 52.57 ± 14.84  | 52.92 ± 14.81  | 52.77 ± 14.83  | 53.06  | 53.09  |
| 0.45          | 57.63 ± 14.26                  | 52.42 ± 15.07  | 52.78 ± 15.05  | 52.63 ± 15.07  | 52.92  | 52.95  |
| 0.50          | 57.61 ± 14.38                  | 52.37 ± 15.20  | 52.73 ± 15.17  | 52.58 ± 15.19  | 52.87  | 52.90  |
| 0.55          | 58.01 ± 14.67                  | 52.76 ± 15.50  | 53.11 ± 15.47  | 52.96 ± 15.50  | 53.26  | 53.28  |
| 0.60          | 58.32 ± 14.58                  | 53.06 ± 15.41  | 53.42 ± 15.38  | 53.27 ± 15.41  | 53.56  | 53.59  |
| 0.65          | 59.13 ± 14.67                  | 53.88 ± 15.50  | 54.24 ± 15.48  | 54.09 ± 15.50  | 54.38  | 54.40  |
| 0.70          | 60.24 ± 14.36                  | 55.01 ± 15.18  | 55.37 ± 15.16  | 55.22 ± 15.18  | 55.5   | 55.52  |
| 0.75          | 61.80 ± 14.26                  | 56.62 ± 15.07  | 56.98 ± 15.05  | 56.83 ± 15.07  | 57.11  | 57.13  |
| 0.80          | 63.73 ± 13.65                  | 58.62 ± 14.43  | 58.97 ± 14.41  | 58.83 ± 14.43  | 59.09  | 59.11  |
| 0.85          | 67.05 ± 12.77                  | 62.07 ± 13.51  | 62.42 ± 13.49  | 62.28 ± 13.51  | 62.52  | 62.54  |
| 0.90          | 71.05 ± 10.46                  | 66.25 ± 11.08  | 66.60 ± 11.06  | 66.47 ± 11.08  | 66.69  | 66.70  |
| <b>Step-5</b> |                                |                |                |                |        |        |
| 0.10          | 82.66 ± 15.00                  | 78.27 ± 15.84  | 78.61 ± 15.82  | 78.49 ± 15.84  | 78.66  | 78.70  |
| 0.15          | 87.43 ± 14.87                  | 83.26 ± 15.70  | 83.55 ± 15.67  | 83.43 ± 15.70  | 83.60  | 83.62  |
| 0.20          | 91.20 ± 14.88                  | 87.11 ± 15.70  | 87.45 ± 15.68  | 87.33 ± 15.70  | 87.49  | 87.51  |
| 0.25          | 94.39 ± 14.88                  | 90.42 ± 15.72  | 90.75 ± 15.69  | 90.64 ± 15.72  | 90.78  | 90.80  |
| 0.30          | 97.51 ± 15.10                  | 93.66 ± 15.93  | 93.99 ± 15.91  | 93.88 ± 15.94  | 94.01  | 94.03  |
| 0.35          | 100.40 ± 14.64                 | 96.66 ± 15.44  | 96.99 ± 15.42  | 96.89 ± 15.44  | 97.01  | 97.03  |
| 0.40          | 103.22 ± 15.05                 | 99.59 ± 15.88  | 99.91 ± 15.85  | 99.81 ± 15.88  | 99.93  | 99.94  |
| 0.45          | 106.15 ± 14.90                 | 102.65 ± 15.71 | 102.97 ± 15.66 | 102.87 ± 15.71 | 102.98 | 103.00 |
| 0.50          | 108.30 ± 14.97                 | 104.87 ± 15.80 | 105.19 ± 15.77 | 105.10 ± 15.79 | 105.20 | 105.21 |
| 0.55          | 111.46 ± 14.85                 | 108.17 ± 15.66 | 108.49 ± 15.63 | 108.40 ± 15.66 | 108.50 | 108.51 |
| 0.60          | 113.74 ± 15.04                 | 110.54 ± 15.85 | 110.85 ± 15.83 | 110.76 ± 15.85 | 110.86 | 110.87 |

|               |                |                |                |                |        |        |
|---------------|----------------|----------------|----------------|----------------|--------|--------|
| 0.65          | 116.39 ± 14.86 | 113.29 ± 15.67 | 113.61 ± 15.64 | 113.52 ± 15.66 | 113.61 | 113.62 |
| 0.70          | 120.35 ± 15.28 | 117.42 ± 16.10 | 117.73 ± 16.08 | 117.65 ± 16.10 | 117.73 | 117.74 |
| 0.75          | 123.77 ± 15.47 | 120.99 ± 16.31 | 121.29 ± 16.28 | 121.22 ± 16.31 | 121.29 | 121.30 |
| 0.80          | 126.66 ± 15.34 | 124.00 ± 16.17 | 124.30 ± 16.14 | 124.23 ± 16.17 | 124.30 | 124.30 |
| 0.85          | 131.43 ± 15.81 | 128.98 ± 16.65 | 129.28 ± 16.63 | 129.21 ± 16.65 | 129.27 | 129.28 |
| 0.90          | 136.36 ± 15.52 | 134.12 ± 16.35 | 134.41 ± 16.33 | 134.35 ± 16.35 | 134.4  | 134.40 |
| <b>Step-6</b> |                |                |                |                |        |        |
| 0.10          | 128.24 ± 5.91  | 125.63 ± 6.17  | 125.93 ± 6.17  | 125.86 ± 6.18  | 125.92 | 125.93 |
| 0.15          | 139.05 ± 4.25  | 136.93 ± 4.42  | 137.22 ± 4.42  | 137.16 ± 4.42  | 137.21 | 137.21 |
| 0.20          | 146.84 ± 6.02  | 145.08 ± 6.29  | 145.36 ± 6.28  | 145.31 ± 6.29  | 145.35 | 145.35 |
| 0.25          | 154.36 ± 3.61  | 152.95 ± 3.75  | 153.23 ± 3.75  | 153.19 ± 3.75  | 153.21 | 153.22 |
| 0.30          | 161.33 ± 3.73  | 160.25 ± 3.88  | 160.51 ± 3.88  | 160.48 ± 3.88  | 160.49 | 160.50 |
| 0.35          | 167.67 ± 2.35  | 166.87 ± 2.43  | 167.13 ± 2.43  | 167.11 ± 2.43  | 167.12 | 167.12 |
| 0.40          | 175.10 ± 4.57  | 174.66 ± 4.77  | 174.91 ± 4.77  | 174.90 ± 4.77  | 174.9  | 174.90 |
| 0.45          | 181.35 ± 5.56  | 181.20 ± 5.82  | 181.44 ± 5.81  | 181.44 ± 5.82  | 181.43 | 181.43 |
| 0.50          | 187.93 ± 6.68  | 188.08 ± 6.99  | 188.31 ± 6.98  | 188.32 ± 6.99  | 188.31 | 188.31 |
| 0.55          | 194.93 ± 7.93  | 195.41 ± 8.31  | 195.63 ± 8.30  | 195.65 ± 8.31  | 195.62 | 195.63 |
| 0.60          | 197.97 ± 13.73 | 198.57 ± 14.41 | 198.80 ± 14.39 | 198.81 ± 14.41 | 198.79 | 198.79 |
| 0.65          | 199.53 ± 13.83 | 200.18 ± 14.51 | 200.40 ± 14.49 | 200.42 ± 14.52 | 200.39 | 200.40 |
| 0.70          | 206.20 ± 19.31 | 207.15 ± 20.27 | 207.36 ± 20.24 | 207.40 ± 20.27 | 207.36 | 207.37 |
| 0.75          | 205.43 ± 26.46 | 206.30 ± 27.79 | 206.51 ± 27.75 | 206.54 ± 27.79 | 206.51 | 206.51 |
| 0.80          | 208.35 ± 33.23 | 209.31 ± 34.91 | 209.52 ± 34.86 | 209.56 ± 34.91 | 209.52 | 209.53 |
| 0.85          | 207.16 ± 46.81 | 208.00 ± 49.19 | 208.22 ± 49.12 | 208.24 ± 49.19 | 208.21 | 208.22 |
| 0.90          | 195.07 ± 57.54 | 195.20 ± 60.48 | 195.44 ± 60.39 | 195.44 ± 60.48 | 195.43 | 195.43 |

**Table S6 Equations used for fitting the  $E_\alpha$  vs.  $\alpha$  data.**

| Steps  | Equation                                              | R <sup>2</sup> |
|--------|-------------------------------------------------------|----------------|
| Step-4 | $\ln A_\alpha = 6.76 - 8.02 \alpha + 8.41 \alpha^2$   | 0.97           |
| Step-5 | $\ln A_\alpha = 6.34 + 6.55 \alpha - 0.02 \alpha^2$   | 0.99           |
| Step-6 | $\ln A_\alpha = 7.44 + 26.02 \alpha - 16.23 \alpha^2$ | 0.99           |

**Table S7. Values of  $\Sigma\delta$  for 35 mechanism functions for Step-4, Step-5 and Step-6 of thermal decomposition of FO11.**

| Sl. No. | Mechanism                                                           |                 |                                  | $\Sigma\delta$ |                |                |
|---------|---------------------------------------------------------------------|-----------------|----------------------------------|----------------|----------------|----------------|
|         | Type                                                                | Symbol          | $g(\alpha)$                      | Step-4         | Step-5         | Step-6         |
| 1       | Chemical Process or mechanism non-invoking equations                | $F_{1/3}$       | $1-(1-\alpha)^{2/3}$             | 0.27433        | 0.14638        | 1.16998        |
| 2       |                                                                     | $F_{3/4}$       | $1-(1-\alpha)^{1/4}$             | 0.47380        | 0.31192        | 0.91623        |
| 3       |                                                                     | $F_{3/2}$       | $(1-\alpha)^{-1/2}-1$            | 1.31702        | 1.1686         | <b>0.25947</b> |
| 4       |                                                                     | $F_2$           | $(1-\alpha)^{-1}-1$              | 2.55671        | 2.41847        | 1.41779        |
| 5       |                                                                     | $F_3$           | $(1-\alpha)^{-2}-1$              | 9.98395        | 9.86313        | 9.32872        |
| 6       | Acceleratory rate equations                                         | $P_{3/2}$       | $\alpha^{3/2}$                   | 0.43936        | 0.27573        | 1.03020        |
| 7       |                                                                     | $P_{1/2}$       | $\alpha^{1/2}$                   | 0.22601        | 0.37275        | 1.54081        |
| 8       |                                                                     | $P_{1/3}$       | $\alpha^{1/3}$                   | 0.28697        | 0.45265        | 1.61313        |
| 9       |                                                                     | $P_{1/4}$       | $\alpha^{1/4}$                   | 0.32354        | 0.49517        | 1.64930        |
| 10      |                                                                     | $E_1$           | $\ln \alpha$                     | 1.49909        | 1.67327        | 2.62755        |
| 11      | Sigmoidal rate Equations or Random nucleation and subsequent growth | $A_1, F_1$      | $-\ln(1-\alpha)$                 | 0.66987        | 0.51084        | 0.70173        |
| 12      |                                                                     | $A_{3/2}$       | $[-\ln(1-\alpha)]^{2/3}$         | 0.23598        | <b>0.12068</b> | 1.14844        |
| 13      |                                                                     | $A_2$           | $[-\ln(1-\alpha)]^{1/2}$         | <b>0.11466</b> | 0.18829        | 1.32912        |
| 14      |                                                                     | $A_3$           | $[-\ln(1-\alpha)]^{1/3}$         | 0.17618        | 0.33614        | 1.48725        |
| 15      |                                                                     | $A_4$           | $[-\ln(1-\alpha)]^{1/4}$         | 0.24094        | 0.41115        | 1.55979        |
| 16      |                                                                     | $A_u$           | $\ln[\alpha/(1-\alpha)]$         | NaN            | NaN            | NaN            |
| 17      | Deceleratory rate equations                                         | $R_1, F_0, P_1$ | $\alpha$                         | 0.20954        | 0.17827        | 1.30775        |
| 18      |                                                                     | $R_2, F_{1/2}$  | $1-(1-\alpha)^{1/2}$             | 0.33711        | 0.18398        | 1.08148        |
| 19      |                                                                     | $R_3, F_{2/3}$  | $1-(1-\alpha)^{1/3}$             | 0.42221        | 0.26106        | 0.97621        |
| 20      |                                                                     | $D_1$           | $\alpha^2$                       | 0.79086        | 0.62247        | 0.71120        |
| 21      |                                                                     | $D_2$           | $\alpha+(1-\alpha)\ln(1-\alpha)$ | 1.20783        | 1.04608        | 0.44501        |
| 22      |                                                                     | $D_3$           | $[1-(1-\alpha)^{1/3}]^2$         | 2.04676        | 1.89467        | 0.91758        |
| 23      |                                                                     | $D_4$           | $1-2\alpha/3-(1-\alpha)^{2/3}$   | 1.44433        | 1.28589        | 0.45918        |
| 24      |                                                                     | $D_5$           | $[(1-\alpha)^{-1/3}-1]^2$        | 6.29401        | 6.15985        | 5.37532        |
| 25      |                                                                     | $D_6$           | $[(1+\alpha)^{1/3}-1]^2$         | 0.58080        | 0.41134        | 0.90520        |
| 26      |                                                                     | $D_7$           | $1+2\alpha/3-(1+\alpha)^{2/3}$   | 0.64246        | 0.47276        | 0.84452        |
| 27      |                                                                     | $D_8$           | $[(1+\alpha)^{-1/3}-1]^2$        | 0.43028        | 0.26991        | 1.06951        |
| 28      | Other kinetics equations with unjustified mechanism                 | $G_1$           | $1-(1-\alpha)^2$                 | 0.2572         | 0.35959        | 1.53452        |
| 29      |                                                                     | $G_2$           | $1-(1-\alpha)^3$                 | 0.32085        | 0.45253        | 1.63156        |
| 30      |                                                                     | $G_3$           | $1-(1-\alpha)^4$                 | 0.35537        | 0.50110        | 1.67816        |
| 31      |                                                                     | $G_4$           | $[-\ln(1-\alpha)]^2$             | 3.49366        | 3.35055        | 2.40372        |
| 32      |                                                                     | $G_5$           | $[-\ln(1-\alpha)]^3$             | 12.09433       | 11.96375       | 11.53107       |
| 33      |                                                                     | $G_6$           | $[-\ln(1-\alpha)]^4$             | 39.15807       | 39.03711       | 40.26164       |
| 34      |                                                                     | $G_7$           | $[1-(1-\alpha)^{1/2}]^{1/2}$     | 0.16134        | 0.29391        | 1.45539        |
| 35      |                                                                     | $G_8$           | $[1-(1-\alpha)^{1/2}]^{1/2}$     | 0.13903        | 0.26146        | 1.41865        |

NaN= not a number.

**Table S8. Values of  $A_\alpha$  of thermal decomposition of FO11 for Step-4, Step-5 and Step-6.**

| $\alpha$ | $A_\alpha$ (min <sup>-1</sup> ) |                       |                       |
|----------|---------------------------------|-----------------------|-----------------------|
|          | Step-4                          | Step-5                | Step-6                |
| 0.10     | $1.62 \times 10^6$              | $5.60 \times 10^6$    | $9.88 \times 10^9$    |
| 0.15     | $5.35 \times 10^5$              | $1.99 \times 10^7$    | $1.61 \times 10^{11}$ |
| 0.20     | $2.24 \times 10^5$              | $5.33 \times 10^7$    | $1.18 \times 10^{12}$ |
| 0.25     | $1.51 \times 10^5$              | $1.21 \times 10^8$    | $7.60 \times 10^{12}$ |
| 0.30     | $1.16 \times 10^5$              | $2.66 \times 10^8$    | $4.12 \times 10^{13}$ |
| 0.35     | $9.56 \times 10^4$              | $5.50 \times 10^8$    | $1.89 \times 10^{14}$ |
| 0.40     | $8.53 \times 10^4$              | $1.10 \times 10^9$    | $1.08 \times 10^{15}$ |
| 0.45     | $8.37 \times 10^4$              | $2.27 \times 10^9$    | $4.60 \times 10^{15}$ |
| 0.50     | $8.43 \times 10^4$              | $3.80 \times 10^9$    | $2.08 \times 10^{16}$ |
| 0.55     | $9.46 \times 10^4$              | $8.19 \times 10^9$    | $1.01 \times 10^{17}$ |
| 0.60     | $1.03 \times 10^5$              | $1.41 \times 10^{10}$ | $1.99 \times 10^{17}$ |
| 0.65     | $1.29 \times 10^5$              | $2.64 \times 10^{10}$ | $2.80 \times 10^{17}$ |
| 0.70     | $1.73 \times 10^5$              | $6.73 \times 10^{10}$ | $1.21 \times 10^{18}$ |
| 0.75     | $2.61 \times 10^5$              | $1.50 \times 10^{11}$ | $9.80 \times 10^{17}$ |
| 0.80     | $4.30 \times 10^5$              | $2.93 \times 10^{11}$ | $1.77 \times 10^{18}$ |
| 0.85     | $1.01 \times 10^6$              | $8.89 \times 10^{11}$ | $1.28 \times 10^{18}$ |

**Table S9 Values of thermodynamic parameters of thermal decomposition of FO11 for Step-4, Step-5 and Step-6.**

| $\alpha$ | $\Delta S$ (J mole <sup>-1</sup> K <sup>-1</sup> ) |         |        | $\Delta H$ (kJ mole <sup>-1</sup> ) |        |        | $\Delta G$ (kJ mole <sup>-1</sup> ) |        |        |
|----------|----------------------------------------------------|---------|--------|-------------------------------------|--------|--------|-------------------------------------|--------|--------|
|          | Step-4                                             | Step-5  | Step-6 | Step-4                              | Step-5 | Step-6 | Step-4                              | Step-5 | Step-6 |
| 0.10     | -138.47                                            | -129.14 | -67.28 | 60.91                               | 74.17  | 121.18 | 128.49                              | 144.53 | 159.59 |
| 0.15     | -147.68                                            | -118.55 | -44.06 | 56.57                               | 79.09  | 132.46 | 128.64                              | 143.68 | 157.62 |
| 0.20     | -154.91                                            | -110.38 | -27.53 | 53.14                               | 82.98  | 140.60 | 128.75                              | 143.12 | 156.32 |
| 0.25     | -158.22                                            | -103.56 | -12.04 | 51.51                               | 86.27  | 148.47 | 128.73                              | 142.69 | 155.34 |
| 0.30     | -160.40                                            | -96.99  | 2.03   | 50.40                               | 89.50  | 155.75 | 128.69                              | 142.35 | 154.60 |
| 0.35     | -162.04                                            | -90.97  | 14.68  | 49.55                               | 92.50  | 162.37 | 128.63                              | 142.07 | 153.99 |
| 0.40     | -162.99                                            | -85.20  | 29.20  | 49.03                               | 95.41  | 170.15 | 128.58                              | 141.83 | 153.49 |
| 0.45     | -163.15                                            | -79.19  | 41.22  | 48.89                               | 98.47  | 176.68 | 128.52                              | 141.61 | 153.15 |
| 0.50     | -163.10                                            | -74.90  | 53.76  | 48.84                               | 100.68 | 183.56 | 128.44                              | 141.49 | 152.87 |
| 0.55     | -162.15                                            | -68.50  | 66.93  | 49.22                               | 103.98 | 190.88 | 128.36                              | 141.30 | 152.67 |
| 0.60     | -161.40                                            | -63.98  | 72.55  | 49.53                               | 106.34 | 194.04 | 128.30                              | 141.20 | 152.63 |
| 0.65     | -159.54                                            | -58.77  | 75.40  | 50.34                               | 109.09 | 195.6  | 128.21                              | 141.11 | 152.61 |
| 0.70     | -157.12                                            | -50.98  | 87.53  | 51.46                               | 113.21 | 202.62 | 128.14                              | 140.99 | 152.66 |
| 0.75     | -153.68                                            | -44.32  | 85.79  | 53.07                               | 116.77 | 201.76 | 128.08                              | 140.92 | 152.78 |
| 0.80     | -149.51                                            | -38.76  | 90.68  | 55.05                               | 119.77 | 204.78 | 128.02                              | 140.89 | 153.0  |
| 0.85     | -142.42                                            | -29.52  | 87.99  | 58.48                               | 124.75 | 203.47 | 127.99                              | 140.83 | 153.24 |
| 0.90     | -134.04                                            | -20.25  | 65.37  | 62.64                               | 129.87 | 190.68 | 128.07                              | 140.90 | 153.36 |

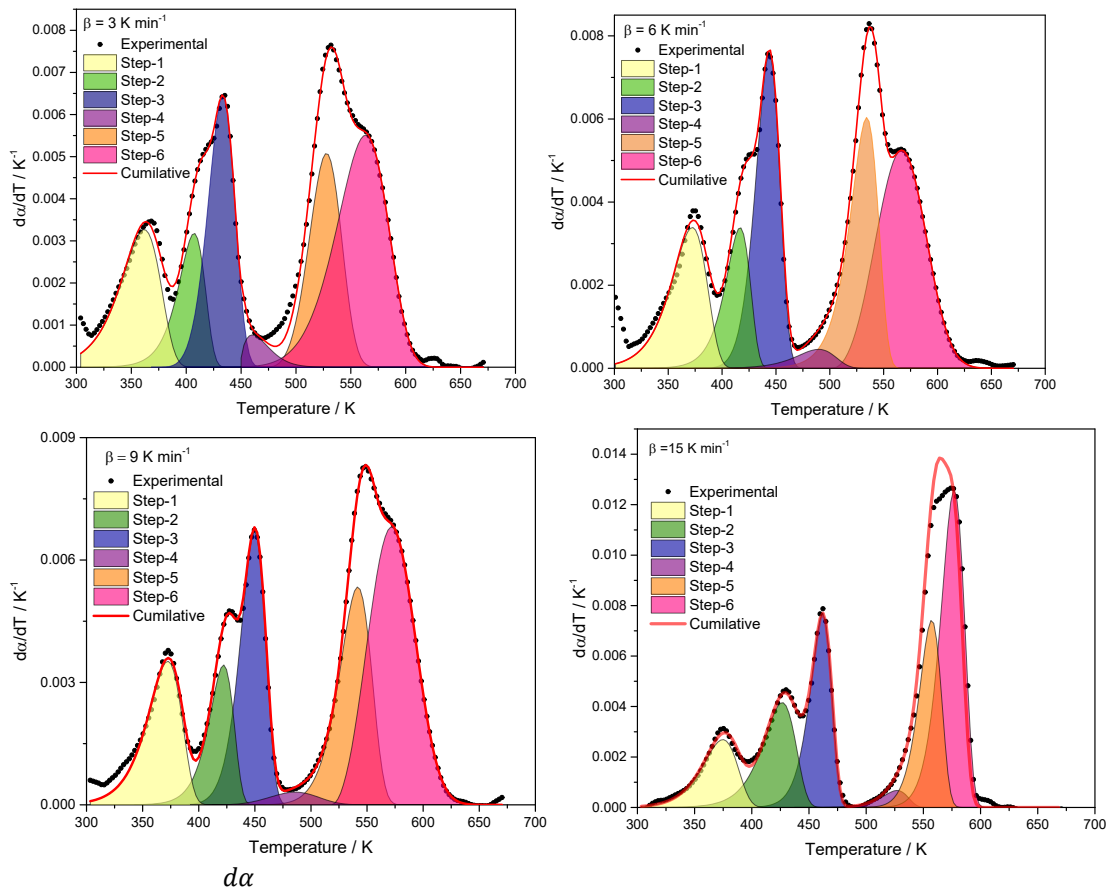

Figure S1  $\frac{d\alpha}{dT}$  vs.  $T$  plots for thermal decomposition of FO11 following Weibull function

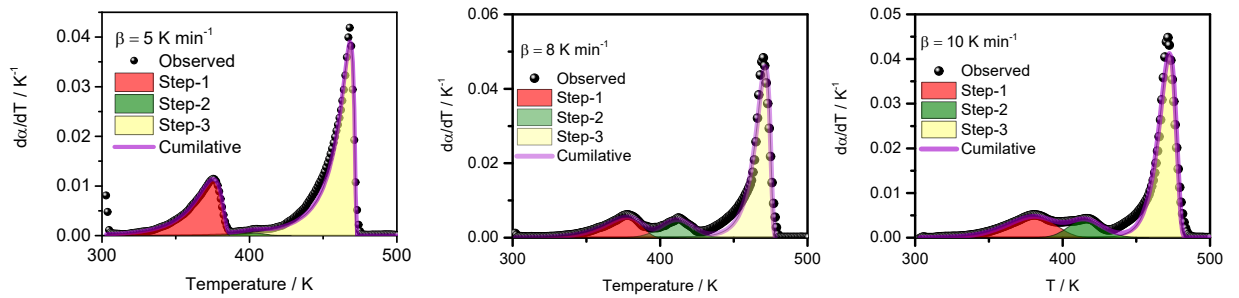

Figure S2  $\frac{d\alpha}{dT}$  vs.  $T$  plots for OxA following Fraser Suzuki function

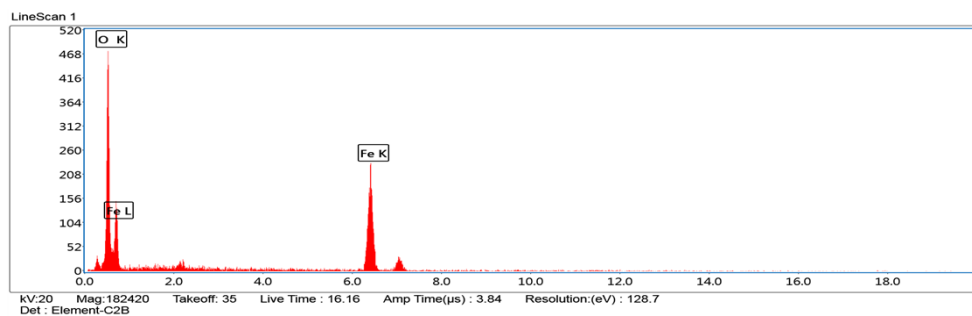

Figure S3 EDX spectrum of the decomposed material obtained from FO11.

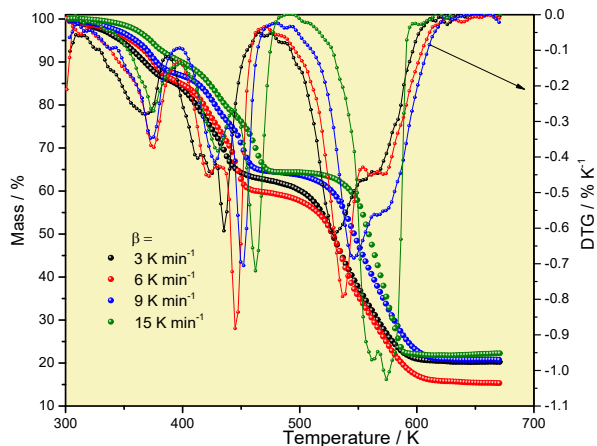

Figure S4 TG and DTG profiles of FO11 for four different heating rates. Arrow indicates the scale used.

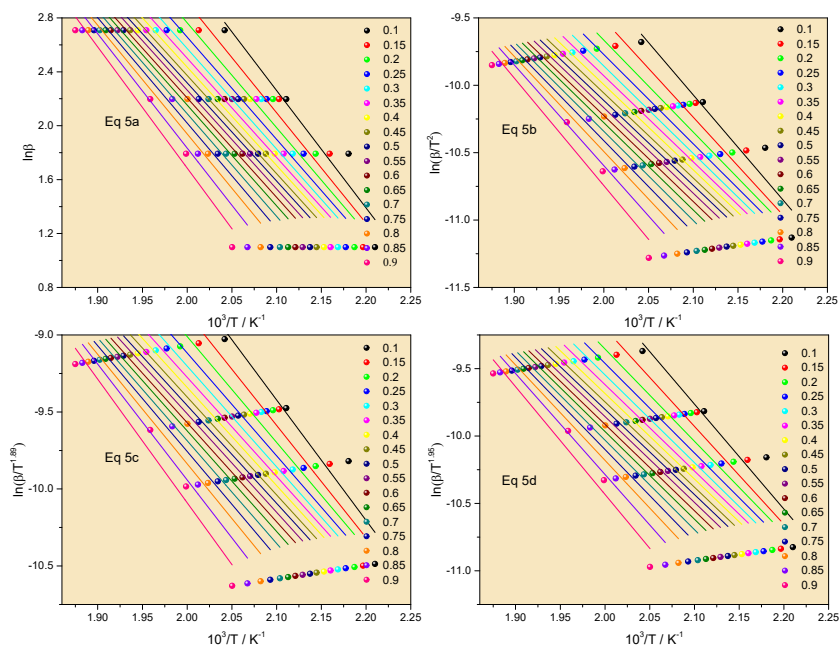

Figure S5-1 The  $\ln(\beta/T^n)$  vs.  $1/T$  curves obtained for Step-4 of thermal decomposition of FO11 for different kinetic methods.

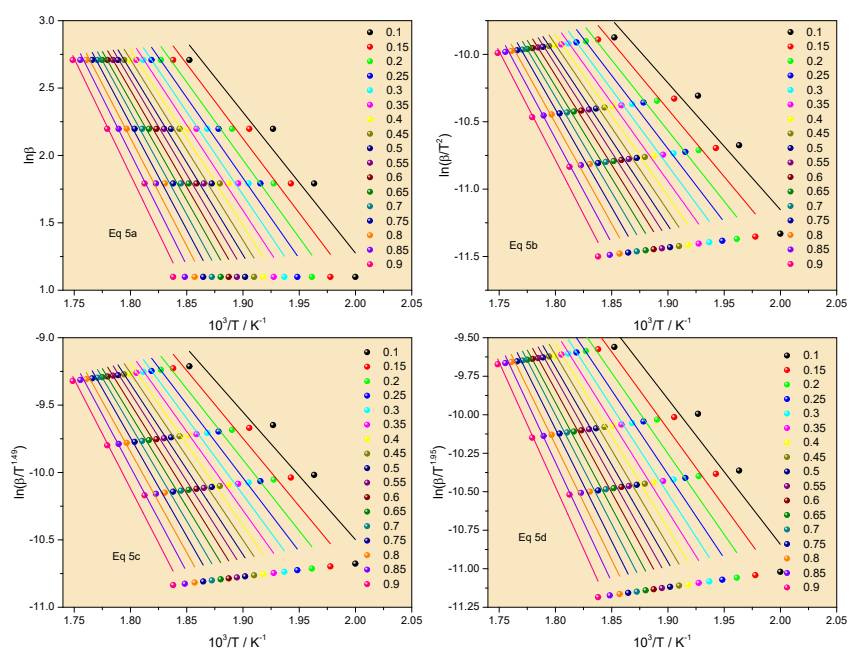

**Figure S5-2 The  $\ln(\beta/T^n)$  vs.  $1/T$  curves obtained for Step-5 of thermal decomposition of FO11 for different kinetic methods.**

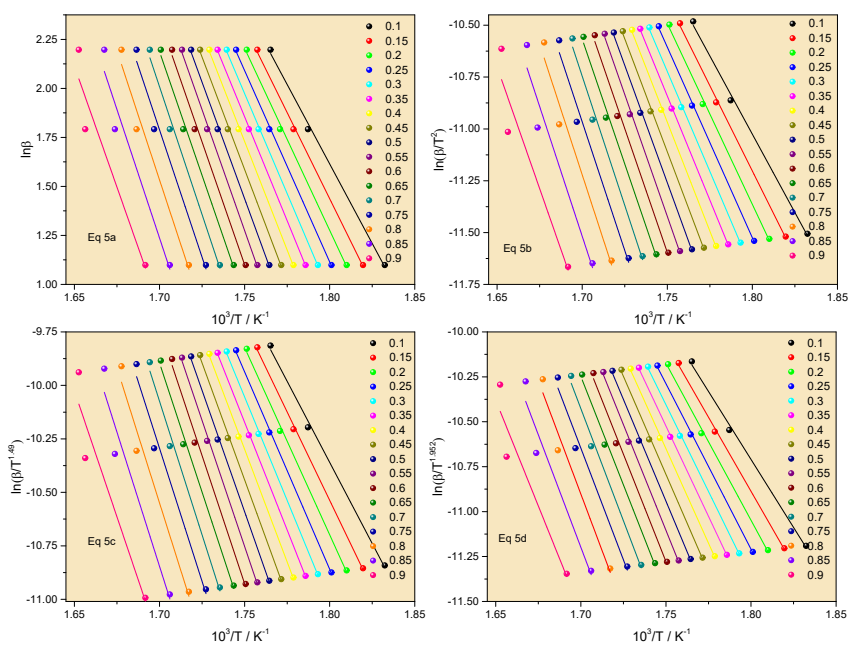

**Figure S5-3 The  $\ln(\beta/T^n)$  vs.  $1/T$  curves obtained for Step-6 of thermal decomposition of FO11 for different kinetic methods.**

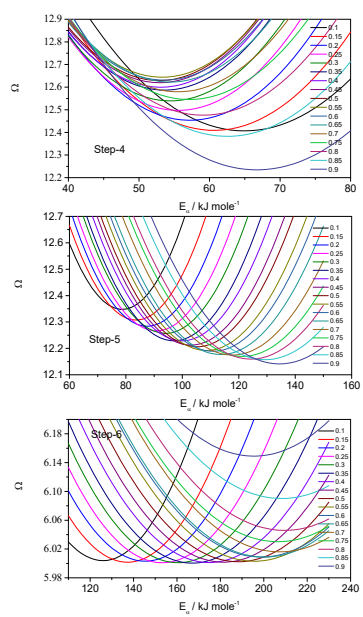

**Figure S6  $\Omega$  vs.  $E_a$  curves for Step-4, Step-5 and Step-6 of FO11.**
